# Supplementary material for: Are Loneliness and Social Isolation Associated with Quality of Life in Older Adults? Insights from Northern and Southern Europe
Source: PubMed Central journal article supplement (PMC7699832; doi:10.3390/ijerph17228637), 2020-11-20
Supplement: ijerph-17-08637-s001.pdf [file ijerph-17-08637-s001.pdf]

# Supplementary Material: Are loneliness and social isolation associated with quality of life in older adults? Insights from Northern and Southern Europe

Giorgi Beridze<sup>1</sup>, Alba Ayala<sup>2,3</sup>, Oscar Ribeiro<sup>4</sup>, Gloria Fernández-Mayoralas<sup>5</sup>, Carmen Rodríguez-Blázquez<sup>6,7</sup>, Vicente Rodríguez-Rodríguez<sup>5</sup>, Fermina Rojo-Pérez<sup>5</sup>, Maria João Forjaz<sup>3,6</sup>, Amaia Calderón-Larrañaga<sup>1,3</sup>

- <sup>1.</sup> Aging Research Center, Department of Neurobiology, Care Sciences and Society, Karolinska Institutet-Stockholm University, Stockholm, Sweden
  - <sup>2.</sup> National School of Public Health, Carlos III Institute of Health, Madrid, Spain
  - <sup>3.</sup> Health Services Research on Chronic Patients Network (REDISSEC), Carlos III Institute of Health, Madrid, Spain
  - <sup>4.</sup> Center for Health Technology and Services Research (CINTESIS), Department of Education and Psychology, University of Aveiro, Aveiro, Portugal
  - <sup>5.</sup> Institute of Economics, Geography and Demography (IEGD), Spanish National Research Council (CSIC), Madrid, Spain
  - <sup>6.</sup> National Centre of Epidemiology, Carlos III Institute of Health, Madrid, Spain
  - <sup>7.</sup> The Network Center for Biomedical Research in Neurodegenerative Diseases (CIBERNED), Madrid, Spain
- \* Correspondence: Giorgi Beridze, Aging Research Center, Karolinska Institutet, Tomtebodavägen 18 A, floor 10, 171 65 Solna, Sweden. Email: giorgi.beridze@ki.se

**Supplementary table 1. Characteristics of non-respondents in Sweden**

|                                        | <b>Participants in<br/>wave 6 only<br/>N=881</b> | <b>Participants in<br/>waves 6 &amp; 7<br/>N=2,995</b> | <b>p-value</b> |
|----------------------------------------|--------------------------------------------------|--------------------------------------------------------|----------------|
| <b>Age (mean, SD)</b>                  | 71.5 (10.5)                                      | 70.4 (8.7)                                             | .053           |
| 50-64                                  | 246 (27.9%)                                      | 805 (26.9%)                                            |                |
| 65-74                                  | 312 (35.5%)                                      | 1,272 (42.5%)                                          |                |
| 75-84                                  | 201 (22.8%)                                      | 726 (24.2%)                                            |                |
| 85+                                    | 122 (13.8%)                                      | 192 (6.4%)                                             |                |
| <b>Gender</b>                          |                                                  |                                                        | .160           |
| Male                                   | 404 (45.9%)                                      | 1,377 (46.0%)                                          |                |
| Female                                 | 477 (54.1%)                                      | 1,618 (54.0%)                                          |                |
| <b>Education level</b>                 |                                                  |                                                        | <.001          |
| Primary                                | 244 (27.7%)                                      | 598 (20.0%)                                            |                |
| Secondary                              | 411 (46.7%)                                      | 1,369 (45.7%)                                          |                |
| Tertiary                               | 226 (25.7%)                                      | 967 (32.3%)                                            |                |
| Missing                                | 0 (0.0%)                                         | 61 (2.0%)                                              |                |
| <b>Activity limitations (mean, SD)</b> | 1.0 (2.5)                                        | 0.4 (1.4)                                              | <.001          |
| 0                                      | 648 (73.6%)                                      | 2,516 (84.0%)                                          |                |
| 1+                                     | 227 (25.7%)                                      | 475 (15.9%)                                            |                |
| Missing                                | 6 (0.7%)                                         | 4 (0.1%)                                               |                |
| <b>Chronic diseases (mean, SD)</b>     | 1.6 (1.5)                                        | 1.4 (1.4)                                              | <.001          |
| 0                                      | 215 (24.4%)                                      | 878 (29.3%)                                            |                |
| 1                                      | 272 (30.9%)                                      | 932 (31.1%)                                            |                |
| 2+                                     | 394 (44.7%)                                      | 1,180 (39.4%)                                          |                |
| Missing                                | 0 (0.0%)                                         | 5 (0.2%)                                               |                |
| <b>EURO-D (mean, SD)</b>               | 2.2 (2.0)                                        | 1.9 (1.8)                                              | <.001          |
| <4                                     | 643 (73.0%)                                      | 2,438 (81.4%)                                          |                |
| ≥4                                     | 183 (20.8%)                                      | 503 (16.8%)                                            |                |
| Missing                                | 55 (6.2%)                                        | 54 (1.8%)                                              |                |
| <b>Memory test</b>                     |                                                  |                                                        | <.001          |
| Fair/Poor                              | 283 (32.1%)                                      | 771 (25.7%)                                            |                |
| Excellent/Very good/Good               | 598 (67.9%)                                      | 2,147 (71.7%)                                          |                |
| Missing                                | 0 (0.0%)                                         | 77 (2.6%)                                              |                |
| <b>Hearing test</b>                    |                                                  |                                                        | <.001          |
| Fair/Poor                              | 182 (20.7%)                                      | 556 (18.6%)                                            |                |
| Excellent/Very good/Good               | 699 (79.3%)                                      | 2,435 (81.3%)                                          |                |
| Missing                                | 0 (0.0%)                                         | 4 (0.1%)                                               |                |
| <b>Eyesight</b>                        |                                                  |                                                        | <.001          |
| Fair/Poor                              | 145 (16.5%)                                      | 379 (12.7%)                                            |                |
| Excellent/Very good/Good               | 736 (83.5%)                                      | 2,612 (87.2%)                                          |                |
| Missing                                | 0 (0.0%)                                         | 4 (0.1%)                                               |                |
| <b>Loneliness (mean, SD)</b>           | 3.8 (1.2)                                        | 3.7 (1.1)                                              | .110           |
| Low                                    | 650 (73.7%)                                      | 2,454 (81.9%)                                          |                |
| High                                   | 189 (21.5%)                                      | 512 (17.1%)                                            |                |
| Missing                                | 42 (4.8%)                                        | 29 (1.0%)                                              |                |
| <b>Social isolation (mean, SD)</b>     | 2.0 (0.9)                                        | 1.8 (0.9)                                              | <.001          |
| Low                                    | 604 (68.6%)                                      | 2,241 (74.8%)                                          |                |
| High                                   | 210 (23.7%)                                      | 588 (19.7%)                                            |                |
| Missing                                | 67 (6.7%)                                        | 166 (5.5%)                                             |                |
| <b>Baseline CASP (mean, SD)</b>        | 39.1 (5.2)                                       | 39.6 (5.0)                                             | <.001          |
| Missing                                | 71 (8.0%)                                        | 124 (4.1%)                                             |                |

Note: p-values obtained using ANOVA and Pearson's chi-square test

**Supplementary table 2.** Characteristics of non-respondents in Spain

|                                        | Participants in<br>wave 6 only<br>N=1,398 | Participants in<br>waves 6 & 7<br>N=4,154 | p-value |
|----------------------------------------|-------------------------------------------|-------------------------------------------|---------|
| <b>Age (mean, SD)</b>                  | 71.7 (11.3)                               | 69.9 (10.2)                               | <.001   |
| 50-64                                  | 453 (32.4%)                               | 1,464 (35.2%)                             |         |
| 65-74                                  | 390 (27.9%)                               | 1,274 (30.7%)                             |         |
| 75-84                                  | 331 (23.7%)                               | 1,029 (24.8%)                             |         |
| 85+                                    | 224 (16.0%)                               | 387 (9.3%)                                |         |
| <b>Gender</b>                          |                                           |                                           | .080    |
| Male                                   | 657 (47.0%)                               | 1,841 (44.3%)                             |         |
| Female                                 | 741 (53.0%)                               | 2,313 (55.7%)                             |         |
| <b>Education level</b>                 |                                           |                                           | .250    |
| Primary                                | 826 (59.1%)                               | 2,385 (57.4%)                             |         |
| Secondary                              | 446 (31.9%)                               | 1,230 (29.6%)                             |         |
| Tertiary                               | 126 (9.0%)                                | 421 (10.2%)                               |         |
| Missing                                | 0 (0.0%)                                  | 118 (2.8%)                                |         |
| <b>Activity limitations (mean, SD)</b> | 1.9 (4.1)                                 | 1.0 (2.7)                                 | <.001   |
| 0                                      | 991 (70.8%)                               | 3,266 (78.6%)                             |         |
| 1+                                     | 402 (28.8%)                               | 884 (21.3%)                               |         |
| Missing                                | 5 (0.4%)                                  | 4 (0.1%)                                  |         |
| <b>Chronic diseases (mean, SD)</b>     | 2.0 (1.7)                                 | 1.9 (1.6)                                 | .054    |
| 0                                      | 298 (21.3%)                               | 790 (19.0%)                               |         |
| 1                                      | 331 (23.7%)                               | 1,145 (27.6%)                             |         |
| 2+                                     | 769 (55.0%)                               | 2,215 (53.3%)                             |         |
| Missing                                | 0 (0.0%)                                  | 4 (0.1%)                                  |         |
| <b>EURO-D (mean, SD)</b>               | 2.4 (2.7)                                 | 2.4 (2.5)                                 | .690    |
| <4                                     | 847 (60.6%)                               | 2,777 (66.9%)                             |         |
| ≥4                                     | 312 (22.3%)                               | 1,034 (24.8%)                             |         |
| Missing                                | 239 (17.1%)                               | 343 (8.3%)                                |         |
| <b>Memory test</b>                     |                                           |                                           | .540    |
| Fair/Poor                              | 576 (41.2%)                               | 1,616 (38.9%)                             |         |
| Excellent/Very good/Good               | 822 (58.8%)                               | 2,398 (57.7%)                             |         |
| Missing                                | 0 (0.0%)                                  | 140 (3.4%)                                |         |
| <b>Hearing test</b>                    |                                           |                                           | .020    |
| Fair/Poor                              | 384 (27.5%)                               | 1,010 (24.3%)                             |         |
| Excellent/Very good/Good               | 1,014 (72.5%)                             | 3,139 (75.6%)                             |         |
| Missing                                | 0 (0.0%)                                  | 5 (0.1%)                                  |         |
| <b>Eyesight</b>                        |                                           |                                           | .003    |
| Fair/Poor                              | 357 (25.5%)                               | 901 (21.7%)                               |         |
| Excellent/Very good/Good               | 1,041 (74.5%)                             | 3,245 (78.1%)                             |         |
| Missing                                | 0 (0.0%)                                  | 8 (0.2%)                                  |         |
| <b>Loneliness (mean, SD)</b>           | 3.8 (1.4)                                 | 3.7 (1.3)                                 | .100    |
| Low                                    | 916 (65.5%)                               | 3,106 (74.8%)                             |         |
| High                                   | 244 (17.5%)                               | 717 (17.2%)                               |         |
| Missing                                | 238 (17.0%)                               | 331 (8.0%)                                |         |
| <b>Social isolation (mean, SD)</b>     | 2.3 (0.9)                                 | 2.1 (0.9)                                 | <.001   |
| Low                                    | 646 (46.2%)                               | 2,496 (60.1%)                             |         |
| High                                   | 482 (34.5%)                               | 1,205 (29.0%)                             |         |
| Missing                                | 270 (19.3%)                               | 453 (10.9%)                               |         |
| <b>Baseline CASP (mean, SD)</b>        | 35.9 (6.6)                                | 36.1 (6.3)                                | .500    |
| Missing                                | 279 (20.0%)                               | 405 (9.7%)                                |         |

Note: p-values obtained using ANOVA and Pearson's chi-square test

**Supplementary table 3.** Baseline characteristics (means, proportions and 95% CI) of unweighted and unimputed sample by country

|                                        | <b>Sweden</b><br>n=2995 | <b>Spain</b><br>n=4154 |
|----------------------------------------|-------------------------|------------------------|
| <b>Age (mean, SD)</b>                  | 70.4 (8.7)              | 69.9 (10.2)            |
| 50-64                                  | 805 (26.9%)             | 1464 (35.2%)           |
| 65-74                                  | 1272 (42.5%)            | 1274 (30.7%)           |
| 75-84                                  | 726 (24.2%)             | 1029 (24.8%)           |
| 85+                                    | 192 (6.4%)              | 387 (9.3%)             |
| <b>Gender</b>                          |                         |                        |
| Male                                   | 1377 (46.0%)            | 1841 (44.3%)           |
| Female                                 | 1618 (54.0%)            | 2313 (55.7%)           |
| <b>Education level</b>                 |                         |                        |
| Primary                                | 598 (20.0%)             | 2385 (57.4%)           |
| Secondary                              | 1369 (45.7%)            | 1230 (29.6%)           |
| Tertiary                               | 967 (32.3%)             | 421 (10.1%)            |
| Missing                                | 61 (2.0%)               | 118 (2.8%)             |
| <b>Activity limitations (mean, SD)</b> | 0.4 (1.4)               | 1.0 (2.7)              |
| 0                                      | 2516 (84.0%)            | 3266 (78.6%)           |
| 1+                                     | 475 (15.9%)             | 884 (21.3%)            |
| Missing                                | 4 (0.1%)                | 4 (0.1%)               |
| <b>Chronic diseases (mean, SD)</b>     | 1.4 (1.4)               | 1.9 (1.6)              |
| 0                                      | 878 (29.3%)             | 790 (19.0%)            |
| 1                                      | 932 (31.1%)             | 1145 (27.6%)           |
| 2+                                     | 1180 (39.4%)            | 2215 (53.3%)           |
| Missing                                | 5 (0.2%)                | 4 (0.1%)               |
| <b>EURO-D (mean, SD)</b>               | 1.9 (1.8)               | 2.4 (2.5)              |
| <4                                     | 2438 (81.4%)            | 2777 (66.9%)           |
| ≥4                                     | 503 (16.8%)             | 1034 (24.8%)           |
| Missing                                | 54 (1.8%)               | 343 (8.3%)             |
| <b>Memory test</b>                     |                         |                        |
| Fair/Poor                              | 771 (25.7%)             | 1616 (38.9%)           |
| Excellent/Very good/Good               | 2147 (71.7%)            | 2398 (57.7%)           |
| Missing                                | 77 (2.6%)               | 140 (3.4%)             |
| <b>Hearing test</b>                    |                         |                        |
| Fair/Poor                              | 556 (18.6%)             | 1010 (24.3%)           |
| Excellent/Very good/Good               | 2435 (81.3%)            | 3139 (75.6%)           |
| Missing                                | 4 (0.1%)                | 5 (0.1%)               |
| <b>Eyesight</b>                        |                         |                        |
| Fair/Poor                              | 379 (12.7%)             | 901 (21.7%)            |
| Excellent/Very good/Good               | 2612 (87.2%)            | 3245 (78.1%)           |
| Missing                                | 4 (0.1%)                | 8 (0.2%)               |
| <b>Loneliness (mean, SD)</b>           | 3.7 (1.1)               | 3.7 (1.3)              |
| Low                                    | 2454 (81.9%)            | 3106 (74.8%)           |
| High                                   | 512 (17.1%)             | 717 (17.2%)            |
| Missing                                | 29 (1.0%)               | 331 (8.0%)             |
| <b>Social isolation (mean, SD)</b>     | 1.8 (0.9)               | 2.1 (0.9)              |
| Low                                    | 2241 (74.8%)            | 2496 (60.1%)           |
| High                                   | 588 (19.7%)             | 1205 (29.0%)           |
| Missing                                | 166 (5.5%)              | 453 (10.9%)            |
| <b>Baseline CASP (mean, SD)</b>        | 39.6 (5.0)              | 36.1 (6.3)             |
| Missing                                | 124 (4.1%)              | 405 (9.7%)             |
